# Supplementary material for: More than just sweet: current insights into microplastics in honey products and a case study of Melipona quadrifasciata honey
Source: Royal Society of Chemistry journal article supplement (doi:10.1039/d4em00262h), 2024-01-01
Supplement: d4em00262h1.pdf [file d4em00262h1.pdf]

## **More than just sweet: current insights into microplastics in honey products and a case study of *Melipona quadrifasciata* honey**

Bárbara Rani-Borges<sup>1\*</sup>; Mariana Victorino Nicolosi Arena<sup>2,3</sup>; Ingrid Naiara Gomes<sup>4,5</sup>; Luís Henrique França de Carvalho Lins<sup>6</sup>; Livia Cestaro de Souza Camargo<sup>1</sup>; Marcelo Pompêo<sup>2</sup>; Rômulo Augusto Ando<sup>1</sup>; Isabel Alves-dos-Santos<sup>2</sup>, Rogério Hartung Toppa<sup>3</sup>; Marcos Roberto Martines<sup>7</sup>; Lucas Gonçalves Queiroz<sup>1</sup>

<sup>1</sup> Department of Fundamental Chemistry, Institute of Chemistry, University of São Paulo, USP, 05508-000 São Paulo, Brazil

<sup>2</sup> Department of Ecology, Institute of Biosciences, University of São Paulo, USP, 05508-090 São Paulo, Brazil

<sup>3</sup> Department of Environmental Sciences, Center for Studies in Landscape Ecology and Conservation, Federal University of São Carlos, UFSCar, 13565-905 Sorocaba, Brazil

<sup>4</sup> Department of Genetics, Ecology, and Evolution, Center for Ecological Synthesis and Conservation, Federal University of Minas Gerais, UFMG, 31270-901 Belo Horizonte, Brazil

<sup>5</sup> Graduate Program in Ecology, Conservation, and Wildlife Management, Federal University of Minas Gerais, UFMG, 31270-910 Belo Horizonte, Brazil

<sup>6</sup> Department of Oceanography, Federal University of Pernambuco, UFPE, 50740-540 Recife, Brazil

<sup>7</sup> Department of Geography, Tourism, and Humanities, Federal University of São Carlos, UFSCar, 13565-905 Sorocaba, Brazil

\* Corresponding author:

barbara.rani-borges@usp.br

**Table S1.** Coordinates of the 8 sampling stations

| ID | Coordinates |         |
|----|-------------|---------|
|    | X           | Y       |
| A  | 320609      | 7403810 |
| B  | 333509      | 7403360 |
| C  | 23353       | 7392910 |
| D  | 333880      | 7395320 |
| E  | 337975      | 7393000 |
| F  | 347388      | 7394840 |
| G  | 324921      | 7382010 |
| H  | 318153      | 7372570 |

**Table S2.** Particles identified in the blank samples

| Replica 1 |          |           |           | Replica 2 |          |           |           | Replica 3 |       |           |           |
|-----------|----------|-----------|-----------|-----------|----------|-----------|-----------|-----------|-------|-----------|-----------|
| Number    | Shape    | Color     | Size (µm) | Number    | Shape    | Color     | Size (µm) | Number    | Shape | Color     | Size (µm) |
| 1         | Fiber    | Black     | 1133.2    | 1         | Fragment | Colorless | 57.6      | 1         | Fiber | Colorless | 844.5     |
| 2         | Fiber    | Colorless | 1352.2    | 2         | Fiber    | Black     | 185.0     | 2         | Fiber | Colorless | 548.9     |
| 3         | Fiber    | Colorless | 1059.1    | 3         | Fragment | Colorless | 153.0     | 3         | Fiber | Colorless | 1136.9    |
| 4         | Fiber    | Colorless | 786.1     | 4         | Fiber    | Black     | 146.2     | 4         | Fiber | Colorless | 1081.3    |
| 5         | Fiber    | Colorless | 601.9     | 5         | Fiber    | Colorless | 302.6     | 5         | Fiber | Colorless | 1936.7    |
| 6         | Fragment | Blue      | 128.1     | 6         | Fragment | Colorless | 275.5     | 6         | Fiber | Colorless | 325.1     |
| 7         | Fiber    | Colorless | 1628.3    | 7         | Fragment | Colorless | 130.9     |           |       |           |           |
| 8         | Fiber    | Blue      | 461.6     | 8         | Fiber    | Colorless | 707.6     |           |       |           |           |
|           |          |           |           | 9         | Fiber    | Colorless | 1066.2    |           |       |           |           |
|           |          |           |           | 10        | Fragment | Colorless | 364.0     |           |       |           |           |

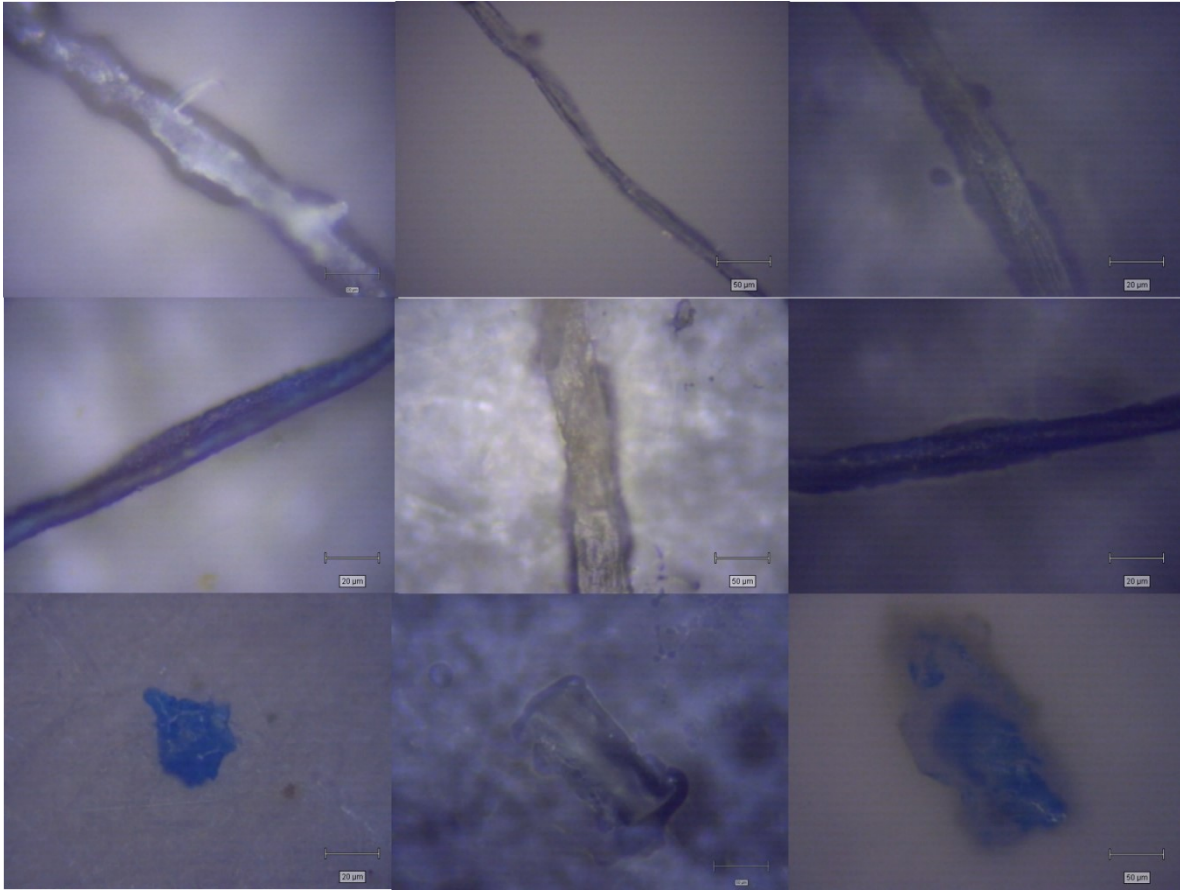

**Fig S1.** Representative particles of microplastics found in the honey samples.
